# Supplementary material for: Electrochemical hydrogenation of non-aromatic carboxylic acid derivatives as a sustainable synthesis process: from catalyst design to device construction
Source: Royal Society of Chemistry journal article supplement (doi:10.1039/c8cp07445c), 2019-01-01
Supplement: c8cp07445c1.pdf [file c8cp07445c1.pdf]

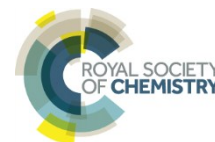

Journal Name

PERSPECTIVE

## Supplementary Information

### Electrochemical hydrogenation of non-aromatic carboxylic acid derivatives as a sustainable synthesis process: from catalyst design to device construction

Masaaki Sadakiyo,<sup>a,b</sup> Takashi Fukushima,<sup>a</sup> Shinichi Hata,<sup>c</sup> Gergely Juhász,<sup>d\*</sup> Miho Yamauchi<sup>a,b\*</sup>

<sup>a</sup> International Institute for Carbon-Neutral Energy Research (WPI-I2CNER), Kyushu University, 744 Moto-oka, Nishi-ku Fukuoka 819-0395, Japan.

<sup>b</sup> Department of Chemistry, Faculty of Science, Kyushu University, Moto-oka 744, Nishi-ku Fukuoka 819-0395, Japan.

<sup>c</sup> Department of Applied Chemistry, Tokyo University of Science Yamaguchi, SanyoOnoda, Yamaguchi 756-0884, Japan.

<sup>d</sup> Department of Chemistry, Graduate School of Science, Tokyo Institute of Technology, Ookayama, Meguro-ku, Tokyo, 152-8550, Japan.

E-mail: yamauchi@i2cner.kyushu-u.ac.jp

juhasz.g.aa@m.titech.ac.jp

#### Experimental details

##### Preparation of electrode

Cathode electrode was prepared through a two-step hydrothermal treatment according to the previous literature.<sup>23</sup> Ti mesh ( $2 \times 2$  cm<sup>2</sup>) was immersed in 1M NaOH and heated at 220 °C for 12 h in a Teflon-lined autoclave. After washing with 0.1 M HCl, the resulting Ti mesh was put in water and heated at 200 °C for 24 h, leading to a formation of white colored electrode of TiO<sub>2</sub>-coated Ti mesh.

##### Electrochemical analysis

Electrochemical hydrogenation of carboxylic acid derivatives was performed through a chronoamperometry using a two-compartment cell with a three electrode system connecting to a potentiostat

(Versastat 4, Princeton Applied Research Inc.). Porous TiO<sub>2</sub> catalysts grown on Ti foil was used as the working electrode.<sup>23</sup> Pt coil was used as a counter electrode. Reaction solution poured in the side with the working electrode includes 0.03 M of a substrate (formic acid, acetic acid, oxamic acid, glyoxylic acid, pyruvic acid, 2-oxopentaonic acid,  $\alpha$ -ketoglutaric acid, trimethylpyruvic acid, acrylic acid, or fumaric acid) and 0.2 M of Na<sub>2</sub>SO<sub>4</sub> as a support electrolyte in water as a solvent (without adjustment of the pH (around 2–3)). pH-adjusted aqueous solution of 0.2 M Na<sub>2</sub>SO<sub>4</sub> was used in the counter side. Ag/AgCl was used as a reference electrode. The reaction was performed by applying –0.7 V (vs. RHE) to the working electrode at 50 °C for 2 h. Note that, in the case with 2-oxopentaonic acid and  $\alpha$ -ketoglutaric acid, the reaction was performed at 25 °C to avoid thermal decomposition of the substrate. Resulting products were separated and quantified by high performance liquid chromatography (HPLC) (Prominence, Shimadzu Inc.) equipping a KC-811 column (Shodex Inc.). Cyclic voltammetry is also carried out with one-compartment cell. Adsorption property of the carboxylic acid derivatives on the TiO<sub>2</sub>-decorated Ti electrode was tested through an immersion of the electrode into an aqueous solution of the substrate (0.005 M) for 2 h at room temperature. After the immersion, the remaining solution was analysed by the HPLC to quantify the amount of adsorbed substrate.

### Computational details

Density functional theory (DFT) B3LYP method was used for estimation of a statistic energy level of molecular orbitals of each substrate. The calculation was performed using Gaussian 03 package (Gaussian Inc.) with 6-31G (d) basis set to fully optimized structures.

The interactions between anatase 101 surface and small molecules were studied with Density-Functional Tight-Binding (DFTB-SCF) method as implemented in DFTB+ software (ver. 1.2).<sup>24,25</sup> We used tio-0-1 and mio-0-1 parameter sets<sup>26, 27</sup> and a convergence criteria of 10<sup>-5</sup> au for SCF cycles, and 10<sup>-3</sup> au for the optimization. Dispersion correction were included using a Lennard-Jones potential between the atoms based on parameters from the Universal Force Field (UFF). Surface absorption models were created on three TiO<sub>2</sub> layer slabs of anatase 101 surfaces, with at least 20 Å vacuum between the slabs. Solvent effects were not considered. The adsorbed molecules and the slab geometry were optimized whereas the cell parameters and bottom TiO<sub>2</sub> layer of the slab were kept constrained. The k-points for the integration of the Brillouin zone at 2x4x1 were chosen using Monkhorst-Pack sampling.<sup>28</sup>

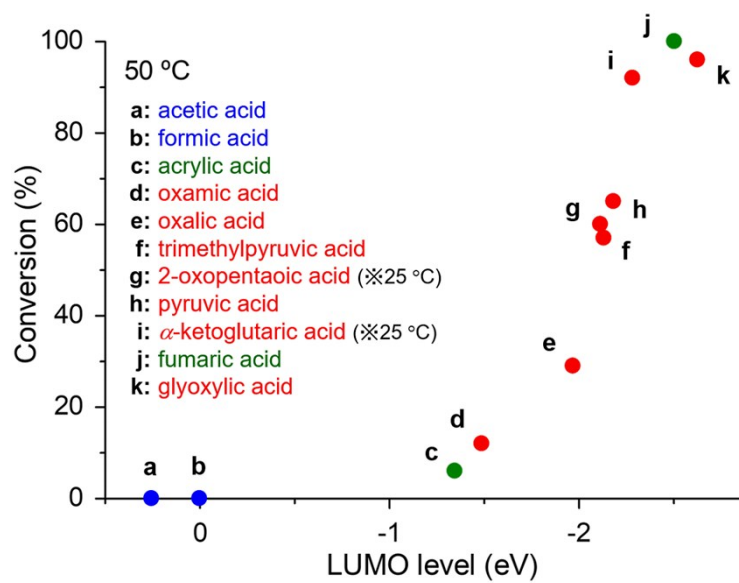

**Figure S1.** LUMO level and experimental reactivity of a substrate.

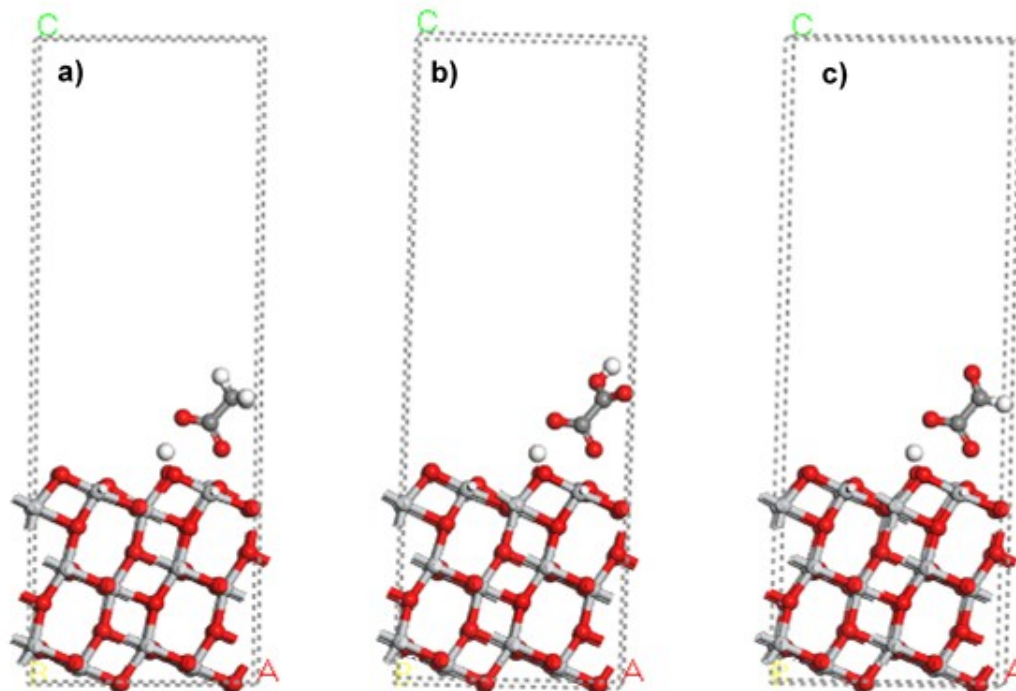

**Figure S2.** The unit cell of computational models for 101 TiO<sub>2</sub> with the absorbent molecules: a) acetic acid, b) oxalic acid, c) glyoxylic acid.
